# Supplementary material
Source: MDPI journal article supplement (https://www.mdpi.com/2073-4441/14/15/2288)
Supplement: s1 [file s1]

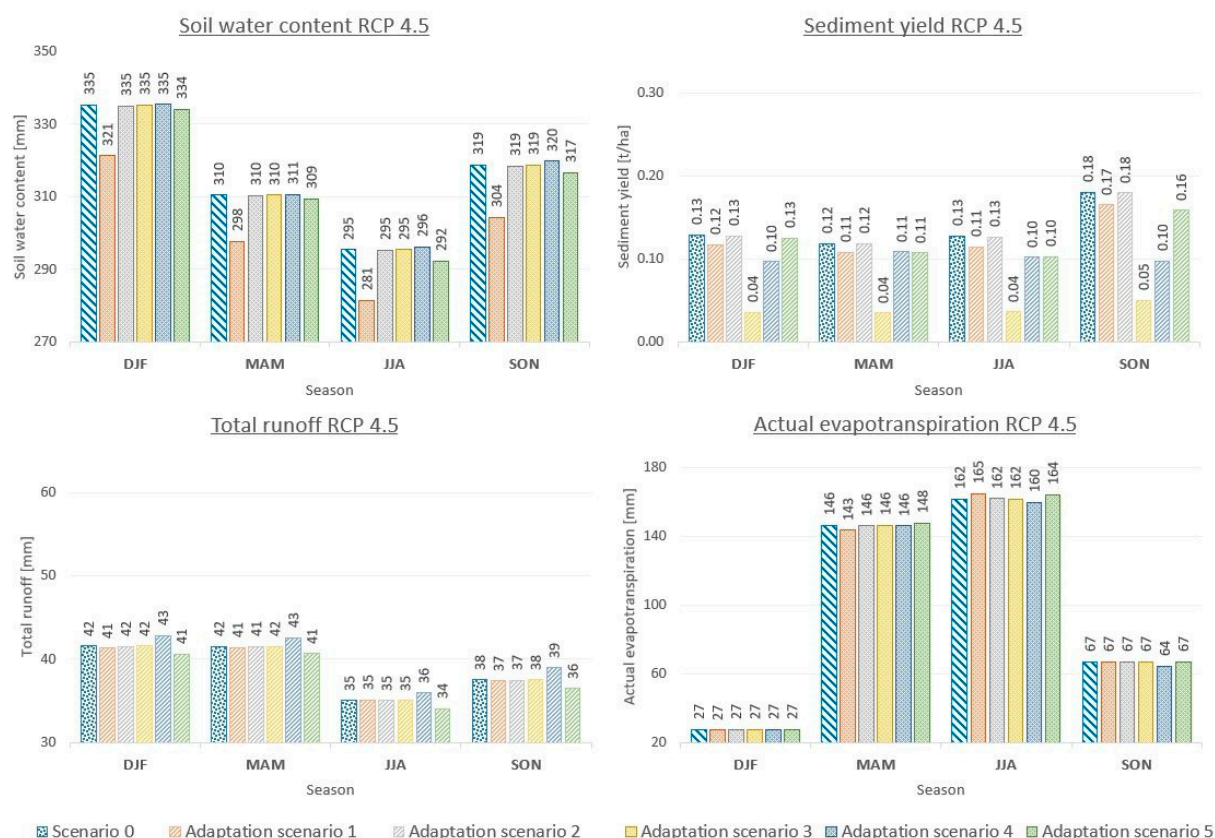

Figure S1: Summary of changes in soil water content, sediment yield, total runoff and actual evapotranspiration in adaptive scenarios 1-5 (AS-1, AS-2, AS-3, AS-4, AS-5) compared to scenario 0 (S-0), for averages of three GCM/RCM combinations in the RCP 4.5 climate change scenario. The list covers four seasons (DJF, MAM, JJA, SON) in the Bystra catchment area. The first adaptation scenario assumes the growth of afforestation on soils from the agricultural usefulness complex of soil 6-8 (semi-dry, permanent dry, semi-moist, permanently wet). The second adaptation scenario assumes the creation of a forested buffer for the Bystra River and its tributaries. The third adaptation scenario shows one the erosion prevention practices in the river bed, the so-called filter strips. The fourth adaptation scenario assumes the reduction of plowing on agricultural land. The fifth adaptation scenario assumes an increase in soil organic carbon content to 2%. Adaptation scenarios 1-5 are modifications of scenario 0. Scenario 0 only covers climate change in 2041-2050 (own study).

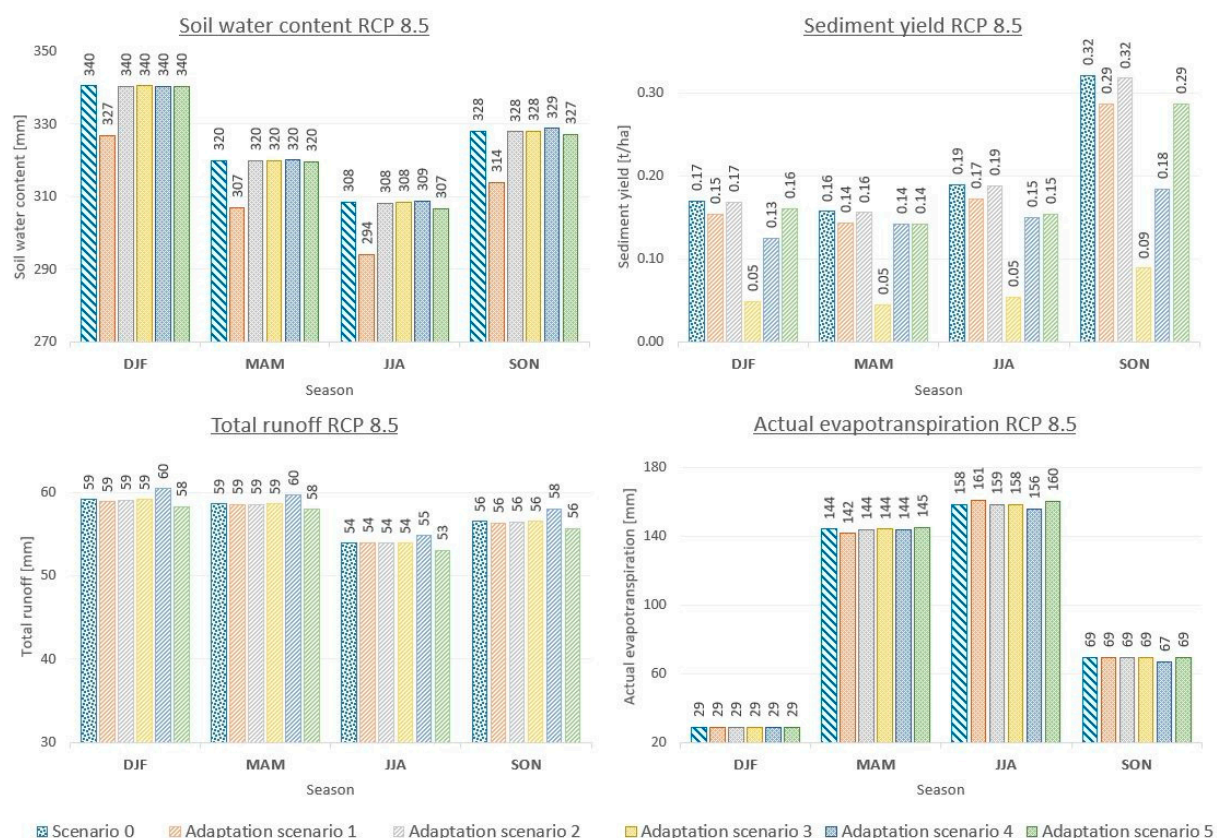

Figure S2: Summary of changes in soil water content, sediment yield, total runoff and actual evapotranspiration in adaptive scenarios 1-5 (AS-1, AS-2, AS-3, AS-4, AS-5) compared to scenario 0 (S-0), for averages of three GCM/RCM combinations in the RCP 8.5 climate change scenario. The list covers four seasons (DJF, MAM, JJA, SON) in the Bystra catchment area. The first adaptation scenario assumes the growth of afforestation on soils from the agricultural usefulness complex of soil 6-8 (semi-dry, permanent dry, semi-moist, permanently wet). The second adaptation scenario assumes the creation of a forested buffer for the Bystra River and its tributaries. The third adaptation scenario shows one the erosion prevention practices in the river bed, the so-called filter strips. The fourth adaptation scenario assumes the reduction of plowing on agricultural land. The fifth adaptation scenario assumes an increase in soil organic carbon content to 2%. Adaptation scenarios 1-5 are modifications of scenario 0. Scenario 0 only covers climate change in 2041-2050 (own study).
